# Supplementary material for: Prevalence and Predictors of Immunological Failure among HIV Patients on HAART in Southern Ethiopia
Source: PLoS One. 2015 May 11;10(5):e0125826. doi: 10.1371/journal.pone.0125826 (PMC4427446; doi:10.1371/journal.pone.0125826)
Supplement: S1 Table — (DOCX) [file pone.0125826.s007.docx]

S2 Table Immunological failure diagnostic criteria and immunological failure after follow-up immunological evaluation (n=172)

| **Diagnostic criteria*** | **# with treatment failure re-evaluated** | **# came out of treatment failure** | **% came out of treatment failure** | **Chi square** | **P value** |
| --- | --- | --- | --- | --- | --- |
| 1 | 99 | 43 | 43.43 | 2.78 | 0.25 |
| 2 | 13 | 4 | 30.77 |  |  |
| 3 | 60 | 32 | 53.33 |  |  |

***** 1=Follow-up CD4 cell count dropped by at least 50% from peak value

2=CD4 cell count persistently below 100/mm3

3=Follow-up CD4 cell count dropped to or below baseline
